# Supplementary material
Source: PubMed Central journal article supplement (PMC6806328)
Supplement: ic9b02176_si_001.pdf [file ic9b02176_si_001.pdf]

## Supporting Information

### **Iodine adsorption in a redox-active metal-organic framework: electrical conductivity induced by host-guest charge-transfer.**

Xinran Zhang,<sup>1</sup> Ivan da Silva,<sup>2</sup> Rodrigo Fazzi,<sup>1,3</sup> Alena M. Sheveleva,<sup>1,4</sup> Xue Han,<sup>1</sup> Ben F. Spencer,<sup>5</sup> Sergey A. Sapchenko,<sup>1,6,7</sup> Floriana Tuna,<sup>1</sup> Eric J.L. McInnes,<sup>1</sup> Ming Li,<sup>8</sup> Sihai Yang<sup>1\*</sup> and Martin Schröder<sup>1\*</sup>

[<sup>1</sup>] School of Chemistry, University of Manchester, Manchester M13 9PL (UK)

[Sihai.Yang@manchester.ac.uk](mailto:Sihai.Yang@manchester.ac.uk); [M.Schroder@manchester.ac.uk](mailto:M.Schroder@manchester.ac.uk)

[<sup>2</sup>] ISIS Facility, STFC Rutherford Appleton Laboratory, Chilton, Oxfordshire OX11 0QX (UK)

[<sup>3</sup>] Institute of Chemistry, Universidade de Sao Paulo, Sao Paulo CEP 05508-000 (BR)

[<sup>4</sup>] International Tomography Centre SB RAS and Novosibirsk State University, Novosibirsk 630090 (Russia)

[<sup>5</sup>] School of Materials, University of Manchester, Manchester M13 9PL (UK)

[<sup>6</sup>] Nikolaev Institute of Inorganic Chemistry, SB RAS, Novosibirsk 630090 (Russia)

[<sup>7</sup>] Novosibirsk State University, Novosibirsk 630090 (Russia)

[<sup>8</sup>] Department of Mechanical, Materials and Manufacturing Engineering, University of Nottingham, Nottingham NG7 2RD (UK)

## 1. Synthesis and Characterisation

### 1.1 Synthesis of MFM-300(V<sup>III</sup>)

A mixture of biphenyl-3,3',5,5'-tetracarboxylic acid (H<sub>4</sub>L, 140 mg, 0.42 mmol), VCl<sub>3</sub> (400 mg, 2.55 mmol), water (10 mL) and hydrochloric acid (0.3 M, 2.0 mL) were placed in a 45mL Teflon autoclave. The solution was degassed under Ar for 0.5h and heated at 483K for 3 days to produce a green microcrystalline powder. The product was separated by filtration, washed with DMF and dried in air (80% yield).

### 1.2 Synthesis of MFM-300(V<sup>IV</sup>)

MFM-300(V<sup>III</sup>) was heated under a pure oxygen flow at 150 °C overnight using a tube furnace at a ramping rate of 1 °C min<sup>-1</sup>. MFM-300(V<sup>IV</sup>) was obtained as black solid and stored under N<sub>2</sub> in a glovebox.

### 1.3 Scanning Electron Microscopy

SEM measurements were undertaken on a Quanta 650 at a working voltage of 20kv with a scale bar up to 1 micron.

### 1.4 Iodine Adsorption and Cycling Test

MFM-300(V<sup>III</sup>) and MFM-300(V<sup>IV</sup>) were synthesized following previously reported methods,<sup>1</sup> the as-synthesized MFM-300(V<sup>III</sup>) and MFM-300(V<sup>IV</sup>) were exchanged with acetone for a week. Complete activation was achieved by heating the acetone-exchanged samples under vacuum (10<sup>-5</sup> mbar) for 12 h at 150 °C. The activated sample was then inserted into a Schlenk flask which contains a vial with an excess of solid I<sub>2</sub>. Pure N<sub>2</sub> (> 99.999%) was slowly dosed into the flask to reach at atmospheric pressure. The flask was then heated at 80 °C for 2 days to allow the full adsorption of I<sub>2</sub> into the desolvated MOFs, a small portion of the samples were taken out for further analysis and the rest of them are still kept in the Schlenk flask and used for further desorbed and cycling experiments.

### 1.5 Thermogravimetric–Mass Spectrometry (TGA-MS) Analysis

Thermogravimetric analysis (SDTQ600 TA Instruments company) coupled with mass spectrometry (Hiden DSMS analyzer) was used to calculate the uptake of adsorbed I<sub>2</sub> molecules within MFM-300(V<sup>III</sup>) and MFM-300(V<sup>IV</sup>). Samples were heated from room temperature to 600 °C at a heating rate of 5 degree min<sup>-1</sup> under a flow of air. The uptake of I<sub>2</sub> in MFM-300(V) was determined by the weight loss of adsorbed I<sub>2</sub> confirmed by mass spectrometry and detection of the characteristic peak at 127 (I<sup>+</sup>).

### 1.6 High Resolution Powder X-ray Diffraction Data

High resolution synchrotron powder X-ray diffraction (PXRD) data were collected at Beamline I11 of Diamond Light Source using multi-analysing crystal-detectors (MACs) and monochromated radiation [ $\lambda = 0.824677(10) \text{ \AA}$ ]. The powder samples were loaded into capillary tubes of 0.7 mm diameter and the data collection was carried out at room temperature.

### 1.7 Rietveld Refinement and Crystallographic Data of I<sub>2</sub>-loaded MFM-300(V<sup>III</sup>) and MFM-300(V<sup>IV</sup>)

The structural model of MFM-300(V<sup>III</sup>) was used as a starting point for Rietveld refinements, which were carried out with Topas Academic 5 program (<http://www.topas-academic.net/>). The organic linkers were modelled as semi-rigid bodies where selected bond distances, bond angles and torsion angles could be refined. Crystallographic positions of adsorbed I<sub>2</sub> were found by sequential difference Fourier map calculations and electron density peaks analysis starting from the activated crystal structure. The final Rietveld refinements included crystal cell parameters, background and profile coefficients, all atomic positions and occupancies for iodine atoms, which were constrained to be the same value for the atoms within each I<sub>2</sub> molecule. Crystallographic parameters from the final Rietveld refinement are summarized in Table S1.

### 1.8 Single Crystal X-ray Structure Determination of I<sub>2</sub>@MFM-300(V<sup>IV</sup>), [V<sub>2</sub>(O)<sub>2</sub>(L)]·0.4I<sub>2</sub>

Data for I<sub>2</sub>@MFM-300(V<sup>IV</sup>) were collected at a temperature of 150 K using a Rigaku FR-X rotating anode diffractometer with Mo radiation ( $\lambda=0.71073 \text{ \AA}$ ), equipped with Hybrid Photon detector HyPix-6000HE and an Oxford Cryosystems nitrogen flow gas system.

### 1.9 X-ray Photoelectron Spectroscopy

Measurements of the I 3d core level were performed using an Axis Ultra Hybrid spectrometer (Kratos Analytical, United Kingdom), using Al-K $\alpha$  radiation (1486.6 eV, using 10 mA emission at 250 W). Binding energy calibration was performed using the C 1s photoelectron peak from adventitious hydrocarbon (284.8 eV).

### 1.10 Electrical Conductivity Test

Electrical conductivity measurements were conducted using a Solartron Analytical Modulab XM Materials Test System (Solartron Analytical, Farnborough, UK) over a frequency range from 0.1 Hz to 1 MHz. Ag paste electrodes were coated on both faces of the pellets of MOF. The impedance data were corrected for sample geometry (thickness/area) and analysed using the commercial software package ZView (Version 3.5e, Scribner Associates Inc., USA).

### **1.11 Electrochemical Measurements**

Electrochemical measurements were conducted in a standard three-electrode glass cell connected with a CHI760e electrochemical workstation. The three-electrode electrochemical cell comprised of a glassy carbon (3 mm) working electrode, which was modified with MOF. A carbon rod was chosen as the counter electrode, and a saturated calomel electrode (SCE) or Ag/AgCl electrode was selected as the reference electrode. 10 mg of MOF was dispersed in 1 mL of iso-propanol (970  $\mu\text{L}$ )/Nafion (30  $\mu\text{L}$ ) by sonication to form a homogeneous ink and then 6  $\mu\text{L}$  of the ink was loaded onto the working electrode over an area of  $\sim 0.0706 \text{ cm}^2$ . Electrochemical impedance spectroscopy (EIS) measurements were carried out from 100000 Hz to 0.1 Hz.

### **1.12 EPR Measurements**

The EPR measurements of MFM-300( $\text{V}^{\text{III}}$ ),  $\text{I}_2$ @MFM-300( $\text{V}^{\text{III/IV}}$ ), MFM-300( $\text{V}^{\text{IV}}$ ) and  $\text{I}_2$ @MFM-300( $\text{V}^{\text{IV}}$ ) were recorded at room temperature (293K) on a Bruker EMX Micro EPR spectrometer, equipped with a X-band (9.8 GHz) microwave bridge, a high-Q resonator and 1.0T electromagnet. The magnetic field was calibrated with 2,2-diphenyl-1-picrylhydrazyl (DPPH) with  $g = 2.0036$ . The spectra were recorded with 5G of modulation amplitude and 2mW of microwave power. Data were analysed with Easyspin package used in MATLAB software version 2013a.<sup>2</sup>

### **1.13 Raman Spectroscopy**

Raman spectra were obtained using an Xplora PLUS Raman microscope (Horiba Company) with a 785 nm laser and a 1200 lines/mm grating. The acquisition time was 30 s and accumulated for 10 cycles.

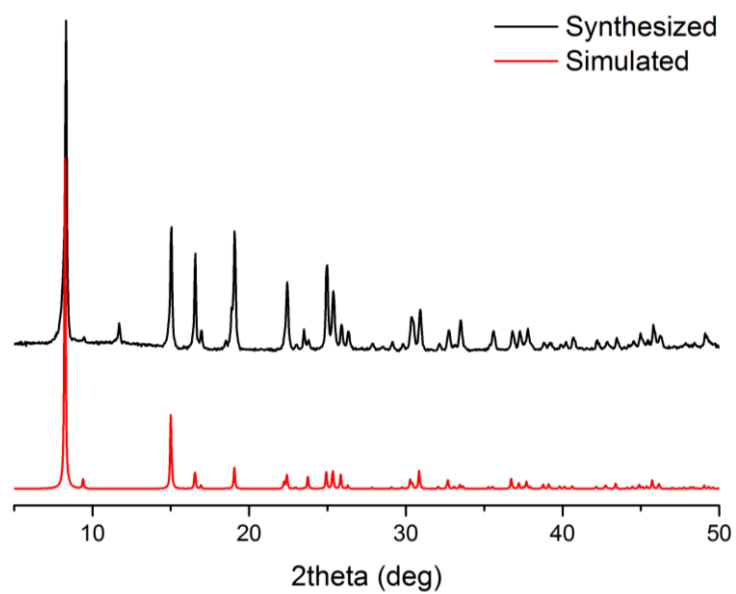

Figure S1. PXRD patterns for as-synthesized MFM-300(V<sup>III</sup>).

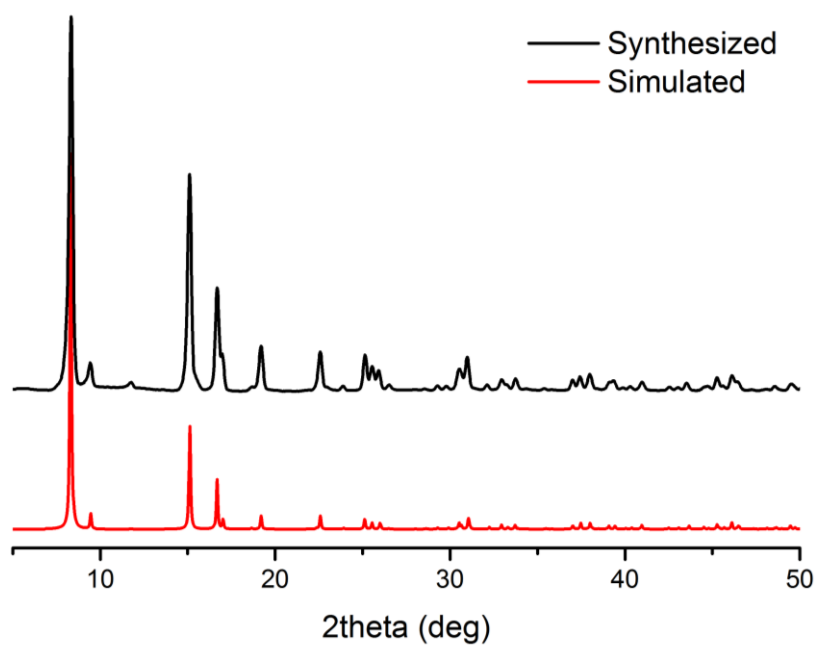

Figure S2. PXRD patterns for as-synthesized MFM-300(V<sup>IV</sup>).

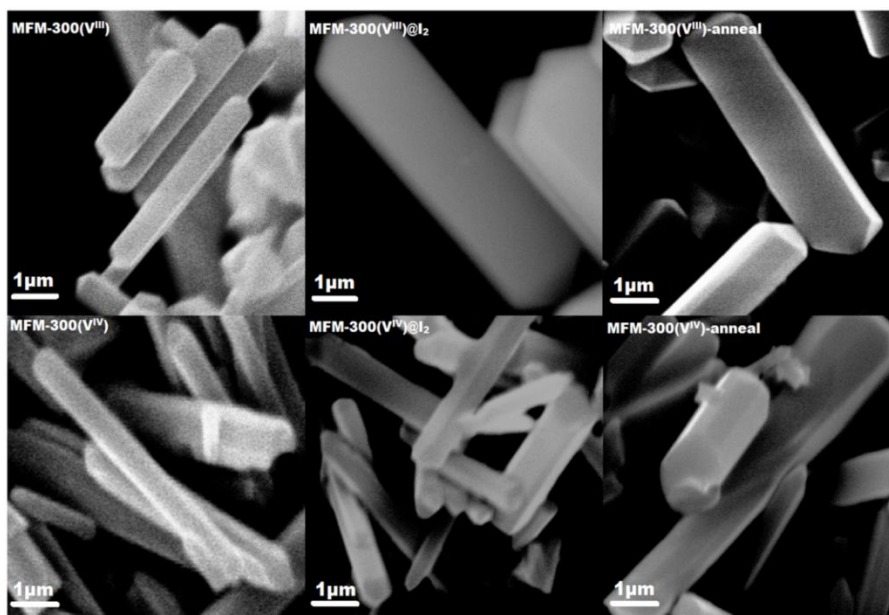

Figure S3. SEM images of MF-300(V<sup>III</sup>), MF-300(V<sup>IV</sup>) and I<sub>2</sub>-loaded materials.

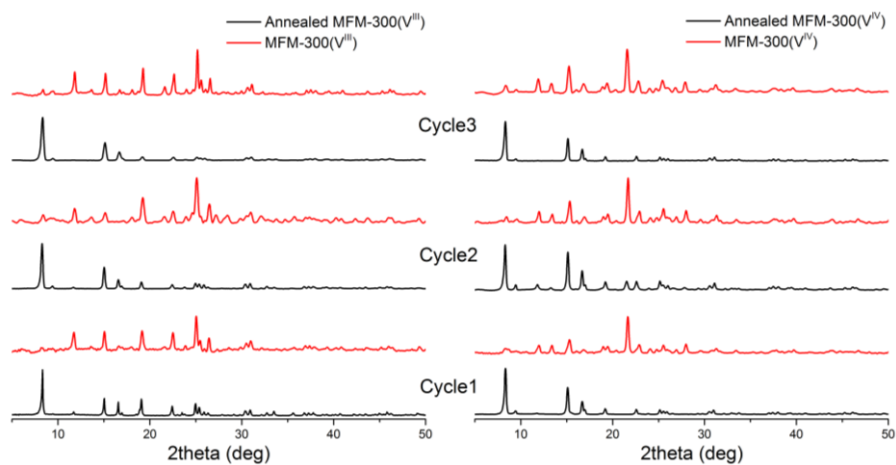

Figure S4. Repeated cycling of I<sub>2</sub> up to 3 cycles for MFM-300(V<sup>III</sup>) and MFM-300(V<sup>IV</sup>)

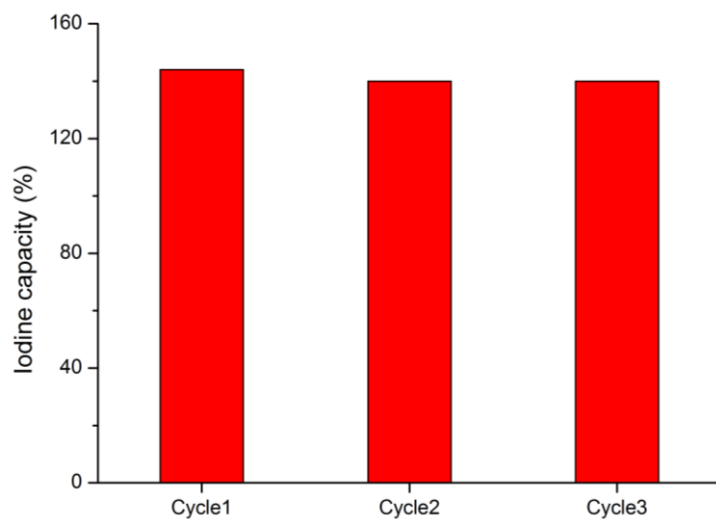

Figure S5: I<sub>2</sub> capacity for three cycles in MFM-300(V<sup>III</sup>).

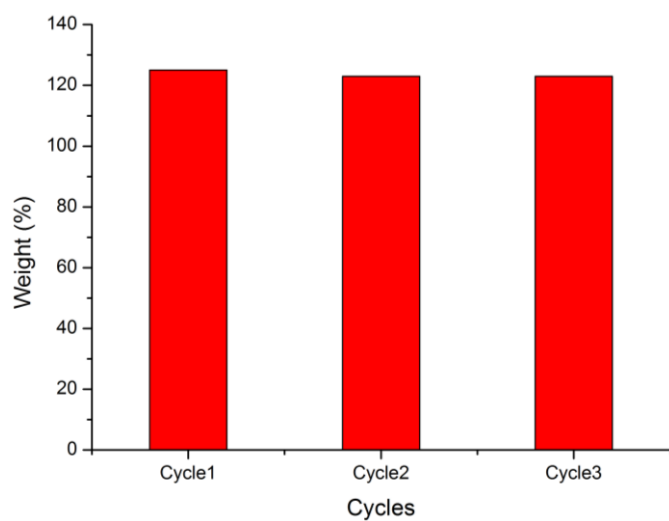

Figure S6: I<sub>2</sub> capacity for three cycles in MFM-300(V<sup>IV</sup>)

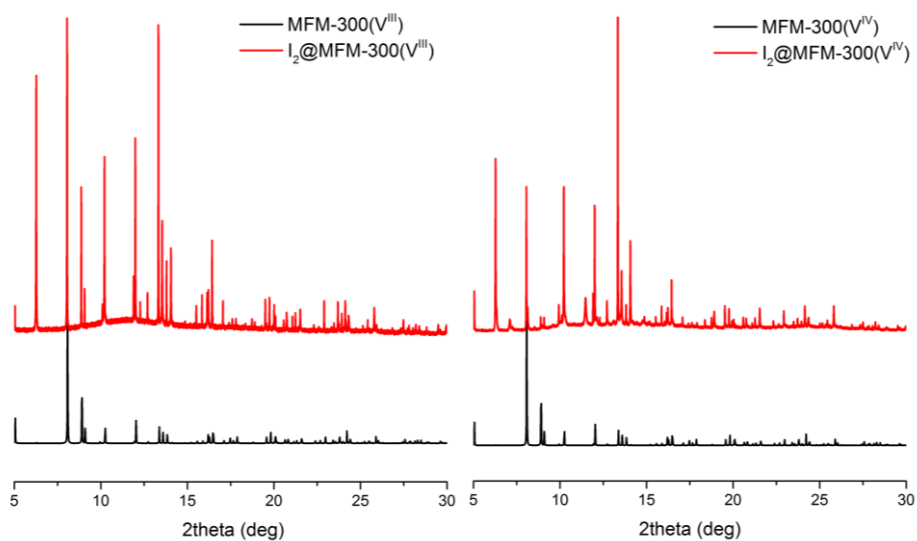

Figure S7. High resolution powder X-ray diffraction data for I<sub>2</sub>-loaded MFM-300(V<sup>III</sup>) and MFM-300(V<sup>IV</sup>).



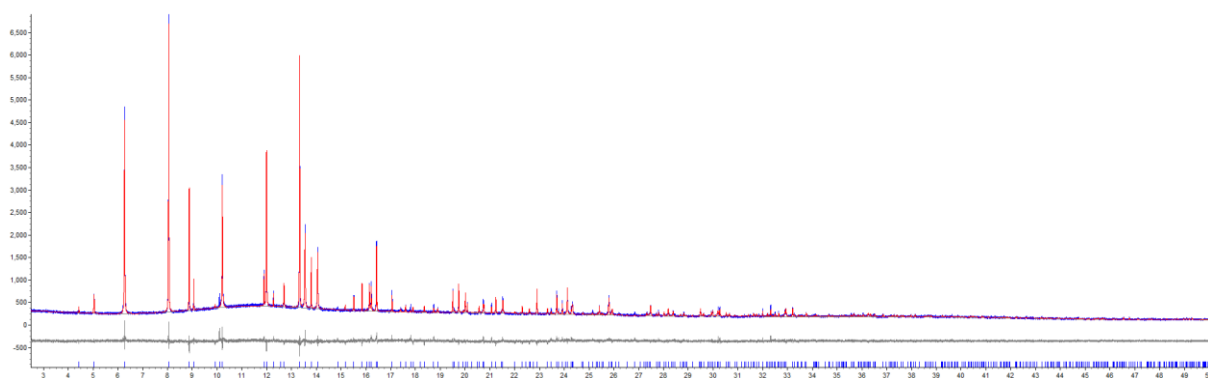

Figure S8. Rietveld structure refinement of  $I_2@MFM-300(V^{III/IV})$ .

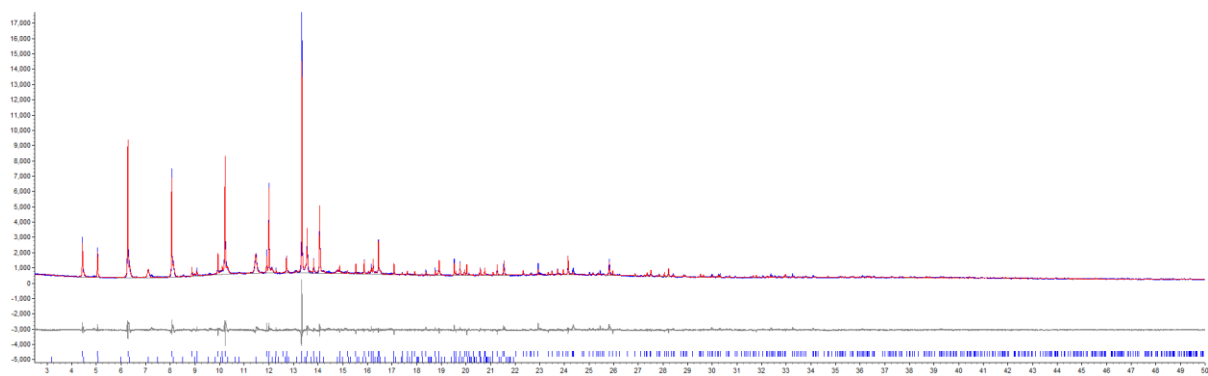

Figure S9. Rietveld structure refinement of  $I_2@MFM-300(V^{IV})$ .

Table S1. Summary of powder X-ray diffraction refinements for I<sub>2</sub> loaded MFM-300(V<sup>III</sup>) and MFM-300(V<sup>IV</sup>) samples.

|                                    | I <sub>2</sub> @MFM-300(V <sup>III/IV</sup> )                                                             | I <sub>2</sub> @MFM-300(V <sup>IV</sup> )                                             |
|------------------------------------|-----------------------------------------------------------------------------------------------------------|---------------------------------------------------------------------------------------|
| Formula                            | C <sub>16</sub> H <sub>8</sub> V <sub>2</sub> O <sub>10</sub> ·1.03(I <sub>2</sub> )·0.6(I <sub>3</sub> ) | C <sub>16</sub> H <sub>6</sub> V <sub>2</sub> O <sub>10</sub> ·2.204(I <sub>2</sub> ) |
| Formula weight (g/mol)             | 951.963                                                                                                   | 1019.49                                                                               |
| Temp/K                             | 298                                                                                                       | 298                                                                                   |
| Radiation type                     | Synchrotron                                                                                               | Synchrotron                                                                           |
| Diffractometer                     | Beamline I11 of Diamond Light Source                                                                      | Beamline I11 of Diamond Light Source                                                  |
| Data collection mode               | Transmission                                                                                              | Transmission                                                                          |
| Wavelength(Å)                      | 0.824884                                                                                                  | 0.825258                                                                              |
| Crystal system                     | Tetragonal                                                                                                | Tetragonal                                                                            |
| Space group                        | I4 <sub>1</sub> 22                                                                                        | I4 <sub>1</sub> 22                                                                    |
| <i>a</i> / Å                       | 15.07864(4)                                                                                               | 15.07259(8)                                                                           |
| <i>b</i> / Å                       | 15.07864(4)                                                                                               | 15.07259(8)                                                                           |
| <i>c</i> / Å                       | 11.97001(4)                                                                                               | 11.95925(9)                                                                           |
| <i>V</i> / Å <sup>3</sup>          | 2721.567(18)                                                                                              | 2716.94(3)                                                                            |
| D <sub>c</sub> /g cm <sup>-3</sup> | 2.32504                                                                                                   | 2.49210                                                                               |
| <i>R</i> <sub>exp</sub> / %        | 4.475                                                                                                     | 3.217                                                                                 |
| <i>R</i> <sub>wp</sub> / %         | 4.979                                                                                                     | 7.334                                                                                 |
| <i>R</i> <sub>p</sub> / %          | 3.843                                                                                                     | 5.088                                                                                 |
| <i>GoF</i>                         | 1.113                                                                                                     | 2.280                                                                                 |
| <i>R</i> <sub>Bragg</sub>          | 2.228                                                                                                     | 2.280                                                                                 |

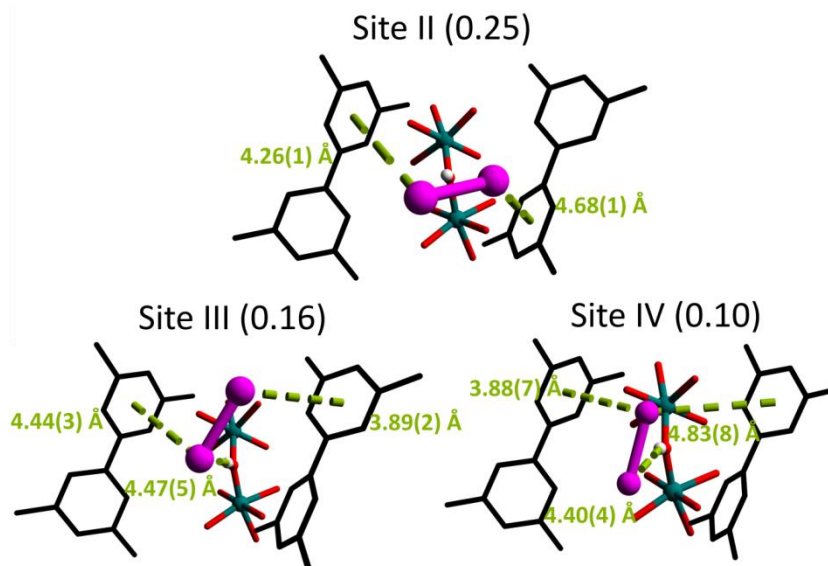

Figure S10. Views of various I<sub>2</sub> binding sites for I<sub>2</sub>@MFM-300(V<sup>III/IV</sup>).

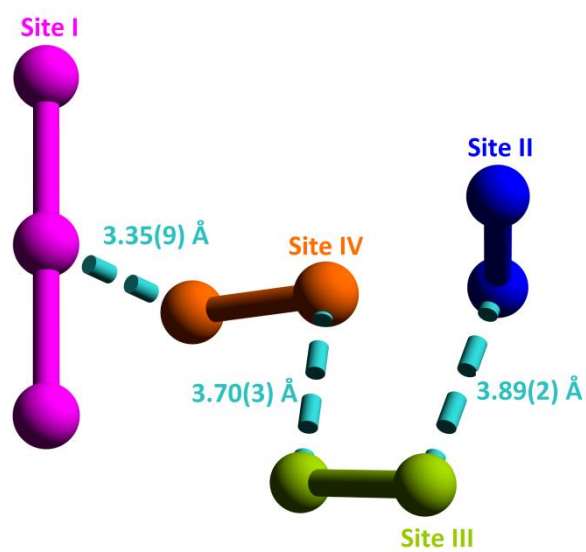

Figure S11. Views of packed I<sub>2</sub> species within the channel of MFM-300(V<sup>III/IV</sup>).

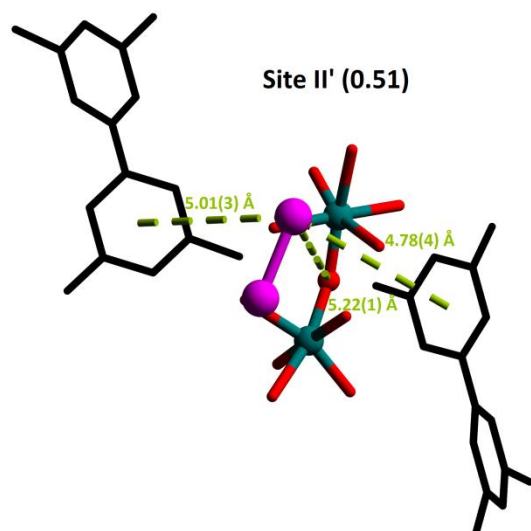

Figure S12. Views of Site II' for I<sub>2</sub>@MFM-300(V<sup>IV</sup>).

Table S2. Summary of single crystal X-ray diffraction refinement for I<sub>2</sub>@MFM-300(V<sup>IV</sup>).

| Complex                                     | MFM-300(V <sup>IV</sup> )·0.4I <sub>2</sub>                                    |
|---------------------------------------------|--------------------------------------------------------------------------------|
| Empirical formula                           | C <sub>16</sub> H <sub>6</sub> I <sub>0.8</sub> O <sub>10</sub> V <sub>2</sub> |
| Formula weight                              | 637.75                                                                         |
| Temperature/K                               | 150(2)                                                                         |
| Crystal system                              | tetragonal                                                                     |
| Space group                                 | I <sub>4</sub> 22                                                              |
| a/Å                                         | 14.9882(7)                                                                     |
| b/Å                                         | 14.9882(7)                                                                     |
| c/Å                                         | 11.9828(9)                                                                     |
| α/°                                         | 90                                                                             |
| β/°                                         | 90                                                                             |
| γ/°                                         | 90                                                                             |
| Volume/Å <sup>3</sup>                       | 2691.9(3)                                                                      |
| Z                                           | 4                                                                              |
| ρ <sub>calc</sub> /cm <sup>3</sup>          | 1.574                                                                          |
| μ/mm <sup>-1</sup>                          | 2.338                                                                          |
| F(000)                                      | 1209.0                                                                         |
| Crystal size/mm <sup>3</sup>                | 0.08 × 0.05 × 0.02                                                             |
| Radiation                                   | MoKα (λ = 0.71073)                                                             |
| 2θ range for data collection/°              | 3.844 to 58.25                                                                 |
| Index ranges                                | -15 ≤ h ≤ 12, -20 ≤ k ≤ 9, -14 ≤ l ≤ 14                                        |
| Reflections collected                       | 7780                                                                           |
| Independent reflections                     | 1615 [R <sub>int</sub> = 0.0369, R <sub>sigma</sub> = 0.0324]                  |
| Data/restraints/parameters                  | 1615/13/86                                                                     |
| Goodness-of-fit on F <sup>2</sup>           | 1.109                                                                          |
| Final R indexes [I >= 2σ (I)]               | R <sub>1</sub> = 0.0539, wR <sub>2</sub> = 0.1525                              |
| Final R indexes [all data]                  | R <sub>1</sub> = 0.0611, wR <sub>2</sub> = 0.1562                              |
| Largest diff. peak/hole / e Å <sup>-3</sup> | 0.62/-0.40                                                                     |
| Flack parameter                             | 0.37(8)                                                                        |

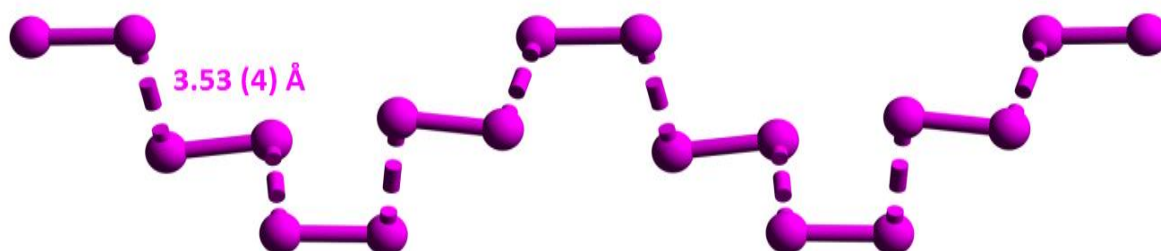

Figure S13. View of single-helical chains of I<sub>2</sub> molecules within MFM-300(V<sup>IV</sup>) from single crystal diffraction data.

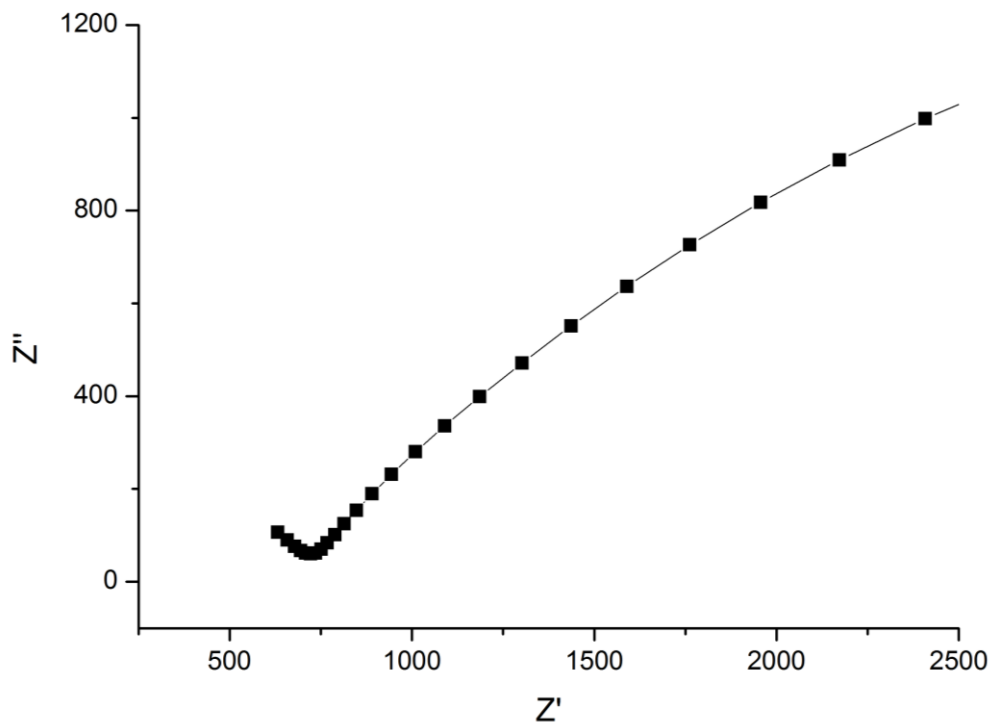

Figure S14: Nyquist plot for  $I_2@MFM-300(V^{III/IV})$  under dark condition.

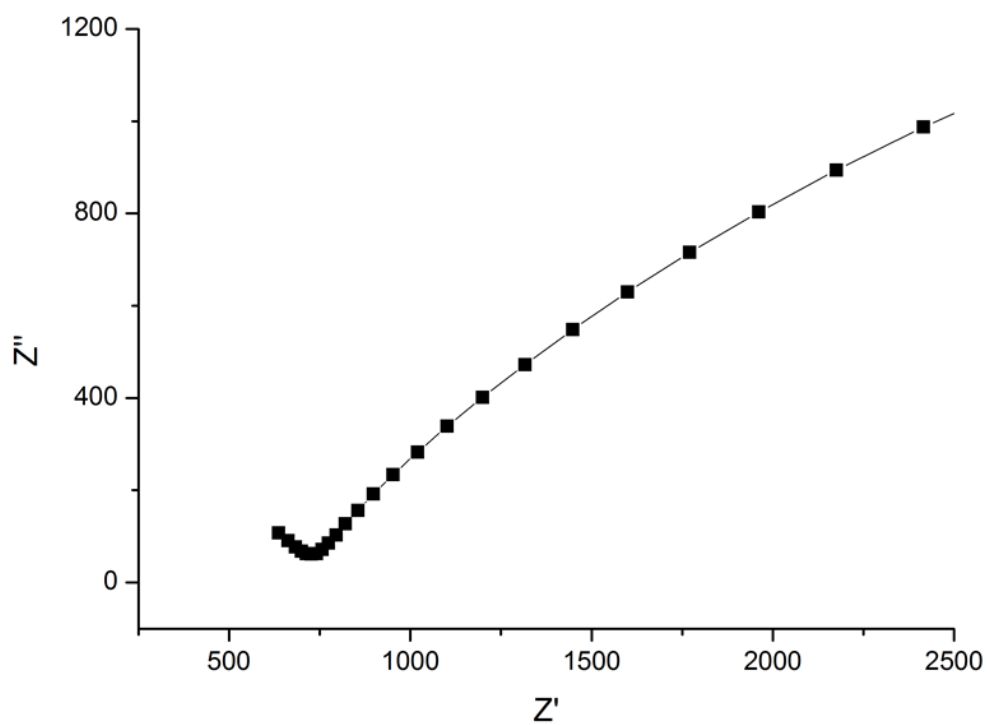

Figure S15: Nyquist plot for  $I_2@MFM-300(V^{III/IV})$  under light condition.

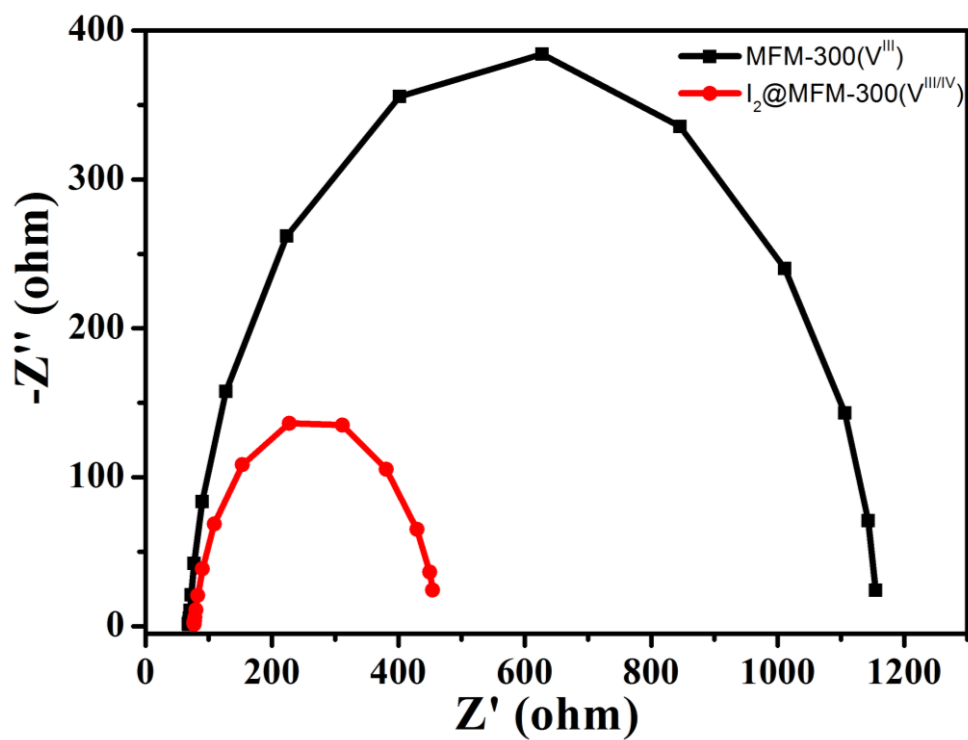

Figure S16: Electrochemical impedance spectrum of MFM-300(V<sup>III</sup>) and I<sub>2</sub>@MFM-300(V<sup>III/IV</sup>)

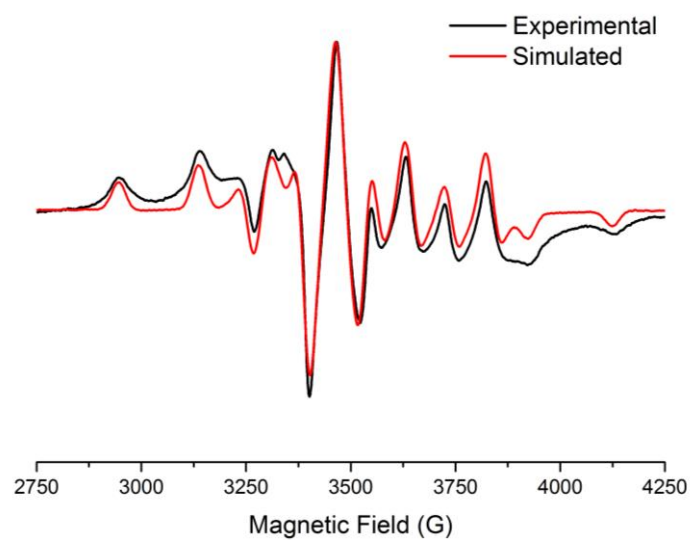

Figure S17. Comparisons between experimental and simulated EPR data of I<sub>2</sub>@MFM-300(V<sup>III/IV</sup>).

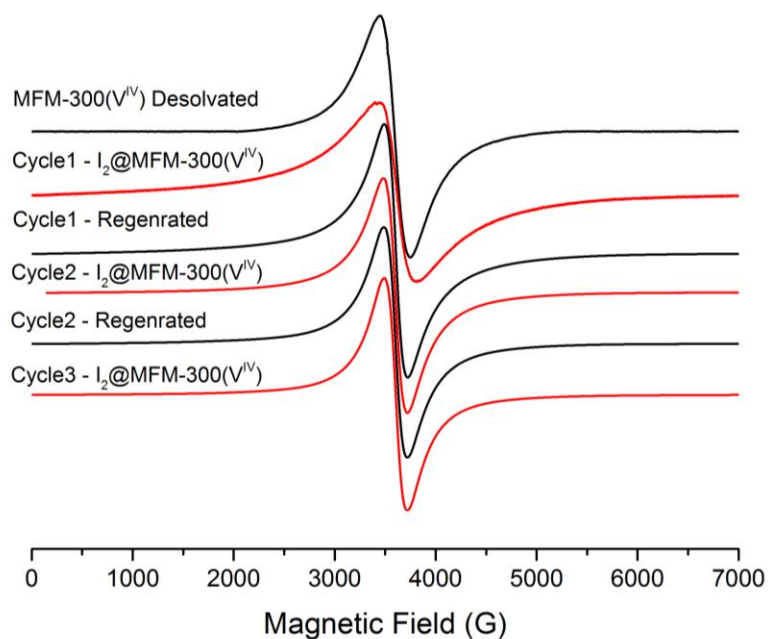

Figure S18. EPR data of MFM-300(V<sup>IV</sup>) cycling with I<sub>2</sub>.

Table S3. EPR parameters for I<sub>2</sub>@MFM-300(V<sup>III/IV</sup>) and MFM-300(V<sup>IV</sup>) obtained by Easyspin software package simulation.

|                                            | $g_{(iso)}$ | $g_{//}$ | $g_{\perp}$ | $A_{//} (G)$ | $A_{\perp} (G)$ |
|--------------------------------------------|-------------|----------|-------------|--------------|-----------------|
| I <sub>2</sub> @MFM-300(V <sup>III</sup> ) | -           | 1.9370   | 1.982       | 190.9        | 80.2            |

## References

- (1) Lu, Z.; Godfrey, H. G. W.; da Silva, I.; Cheng, Y.; Savage, M.; Tuna, F.; McInnes, E. J. L.; Teat, S. J.; Gagnon, K. J.; Frogley, M. D.; et al. Modulating Supramolecular Binding of Carbon Dioxide in a Redox-Active Porous Metal-Organic Framework. *Nat. Commun.* **2017**, *8*, 14212–14222.
- (2) Stoll, S.; Schweiger, A. EasySpin, a Comprehensive Software Package for Spectral Simulation and Analysis in EPR. *J. Magn. Reson.* **2006**, *178*, 42–55.
